# Supplementary material for: Simultaneous binding of Guidance Cues NET1 and RGM blocks extracellular NEO1 signaling
Source: PubMed Central journal article supplement (PMC8063088; doi:10.1016/j.cell.2021.02.045), 2021-04-15
Supplement: mmc1.pdf [file mmc1.pdf]

**Supplemental information**

**Simultaneous binding of Guidance Cues NET1  
and RGM blocks extracellular NEO1 signaling**

**Ross A. Robinson, Samuel C. Griffiths, Lieke L. van de Haar, Tomas Malinauskas, Eljo Y. van Battum, Pavol Zelina, Rebekka A. Schwab, Dimple Karia, Lina Malinauskaite, Sara Brignani, Marleen H. van den Munkhof, Özge Düdükçü, Anna A. De Ruiten, Dianne M.A. Van den Heuvel, Benjamin Bishop, Jonathan Elegheert, A. Radu Aricescu, R. Jeroen Pasterkamp, and Christian Siebold**

**Cell, Volume 184**

## **Supplemental information**

### **Simultaneous binding of Guidance Cues NET1 and RGM blocks extracellular NEO1 signaling**

Ross A. Robinson, Samuel C. Griffiths, Lieke L. van de Haar, Tomas Malinauskas, Eljo Y. van Battum, Pavol Zelina, Rebekka A. Schwab, Dimple Karia, Lina Malinauskaite, Sara Brignani, Marleen H. van den Munkhof, Özge Düdükçü, Anna A. De Ruiter, Dianne M.A. Van den Heuvel, Benjamin Bishop, Jonathan Elegheert, A. Radu Aricescu, R. Jeroen Pasterkamp, and Christian Siebold

**Table S1: Crystallographic Data Collection and Refinement Statistics. Related to Figure 1, 2 and 3.**

|                                                                     | <b>Ternary NEO1-NET1-<br/>RGMB complex</b> | <b>Binary NEO1-NET1<br/>complex</b>    |
|---------------------------------------------------------------------|--------------------------------------------|----------------------------------------|
| <b>Data collection</b>                                              |                                            |                                        |
| Beamline                                                            | DLS-I03                                    | DLS-I03                                |
| Space group                                                         | R32                                        | C2                                     |
| Cell dimensions<br>a, b, c (Å)<br>$\alpha$ , $\beta$ , $\gamma$ (°) | 136.8, 136.8, 430.1<br>90.0, 90.0, 120.0   | 160.0, 49.6, 157.3<br>90.0, 99.4, 90.0 |
| Wavelength (Å)                                                      | 0.9763                                     | 0.9763                                 |
| Resolution (Å)                                                      | 79.62-3.25 (3.31-3.25)                     | 77.57-3.15 (3.23-3.15)                 |
| No. unique reflections                                              | 24856 (1184)                               | 19817 (1376)                           |
| Completeness (%)                                                    | 99.9 (99.6)                                | 97.5 (94.4)                            |
| Multiplicity                                                        | 8.1 (8.1)                                  | 3.3 (2.8)                              |
| $\langle I/\sigma(I) \rangle$                                       | 16.7 (1.2)                                 | 6.6 (1.0)                              |
| R <sub>merge</sub> (%)                                              | 8.8 (>100)                                 | 11.9 (93.4)                            |
| R <sub>pim</sub> (%)                                                | 4.6 (>100)                                 | 11.8 (92.2)                            |
| CC <sub>1/2</sub>                                                   | 0.999 (0.321)                              | 0.993 (0.336)                          |
| CC*                                                                 | 1.000 (0.732)                              | 0.998 (0.707)                          |
| <b>Refinement</b>                                                   |                                            |                                        |
| Resolution                                                          | 3.37-3.25                                  | 3.26-3.15                              |
| No. reflections (test set)                                          | 24845 (1276)                               | 19809 (1015)                           |
| R <sub>work</sub> / R <sub>free</sub> (%)                           | 25.0/26.4                                  | 21.2/23.9                              |
| CC <sub>work</sub>                                                  | 0.88 (0.58)                                | 0.90 (0.55)                            |
| CC <sub>free</sub>                                                  | 0.89 (0.42)                                | 0.92 (0.51)                            |
| No. atoms:                                                          |                                            |                                        |
| Protein                                                             | 6971                                       | 5654                                   |
| Ligand/Ion                                                          | 282                                        | 124                                    |
| B factors (Å <sup>2</sup> ):                                        |                                            |                                        |
| Protein                                                             | 161                                        | 114                                    |
| Ligand/Ion                                                          | 211                                        | 164                                    |
| RMSD bond lengths (Å)                                               | 0.010                                      | 0.011                                  |
| RMSD bond angles (°)                                                | 1.67                                       | 1.53                                   |
| Ramachandran plot (%)                                               |                                            |                                        |
| Favoured                                                            | 96.2                                       | 95.7                                   |
| Allowed                                                             | 3.8                                        | 4.3                                    |
| Outliers                                                            | 0                                          | 0                                      |

Values in parentheses correspond to the highest resolution shell unless otherwise stated. RMSD: Root Mean Square Deviation. R<sub>PIM</sub>: precision-indicating merging. R-factor. R<sub>merge</sub>: merged R-factor. CC<sub>1/2</sub>, CC\*: correlation coefficients between random half data sets. CC<sub>WORK</sub>/CC<sub>FREE</sub>: standard and cross-validated correlations of the experimental intensities with the intensities calculated from the refined molecular model.

**Table S2. Cryo-EM data collection and structure refinement of the NEO1-NET1-RGMB complex. Related to Figure 2.**

| <b>Ternary NEO1-NET1-RGMB complex</b>               |                                         |
|-----------------------------------------------------|-----------------------------------------|
| <b>Data collection</b>                              |                                         |
| Microscope                                          | Titan Krios with Volta phase plate      |
| Nominal magnification                               | 96000×                                  |
| Voltage (kV)                                        | 300                                     |
| Detector                                            | FEI Falcon III direct electron detector |
| Pixel size (Å)                                      | 0.85                                    |
| Electron exposure (e <sup>-</sup> /Å <sup>2</sup> ) | 40.0                                    |
| Exposure length (s)                                 | 37.26                                   |
| Number of fractions                                 | 40                                      |
| Defocus (μm)                                        | -0.5, -0.7                              |
| Micrographs collected (no.)                         | 1635                                    |
| Initial particle images (no.)                       | 280158                                  |
| Final particle images (no.)                         | 68541                                   |
| Symmetry imposed                                    | C3                                      |
| Map resolution (Å)                                  | 6.0                                     |
| FSC threshold                                       | 0.143                                   |
| <b>Refinement</b>                                   |                                         |
| Model composition                                   |                                         |
| Protein residues                                    | 2643                                    |
| Non-hydrogen atoms                                  | 20934                                   |
| Protein atoms                                       | 20763                                   |
| ...N-Acetylglucosamine                              | 168                                     |
| Calcium atoms                                       | 3                                       |
| R.m.s. deviations                                   |                                         |
| Bond lengths (Å)                                    | 0.011                                   |
| Bond angles (°)                                     | 1.508                                   |
| Validation                                          |                                         |
| MolProbity score                                    | 1.41                                    |
| Clash score                                         | 1.87                                    |
| Poor rotamers (%)                                   | 1.82                                    |
| Ramachandran plot                                   |                                         |
| Favored (%)                                         | 96.16                                   |
| Allowed (%)                                         | 3.84                                    |
| Disallowed (%)                                      | 0.00                                    |

**Table S3. NEO1-interacting proteins identified in the anti-GFP *in vivo* NEO1 proteomics screen. Related to Figure 6 and 7.**

| #  | Protein name                                        | Acronym | MW (kDa) | GFP-Neogenin |                 | Biological function                                                                                                                                          |
|----|-----------------------------------------------------|---------|----------|--------------|-----------------|--------------------------------------------------------------------------------------------------------------------------------------------------------------|
|    |                                                     |         |          | Mascot score | Unique peptides |                                                                                                                                                              |
| 1  | Neogenin                                            | NEO1    | 160      | 661          | 16              | axon guidance; cell adhesion; migration                                                                                                                      |
| 2  | Desmin                                              | DES     | 53       | 227          | 5               | actin cytoskeleton organization; type III intermediate filament; neuromuscular junction                                                                      |
| 3  | RNA binding motif protein 14                        | RBM14   | 69       | 276          | 6               | RNA transcription                                                                                                                                            |
| 4  | Doublecortin-like kinase 2                          | DCLK1   | 47       | 248          | 6               | protein serine/threonine kinase activity; cell differentiation; axon outgrowth; dendrite morphogenesis; neuron migration                                     |
| 5  | Actin binding LIM protein family, member 3          | ABLIM3  | 78       | 236          | 5               | actin cytoskeleton organization; axon guidance; regulation of transcription                                                                                  |
| 6  | Topoisomerase (DNA) II beta                         | TOP2B   | 182      | 220          | 5               | DNA binding; neuromuscular junction; neuron migration; neuronal differentiation; neurite outgrowth; corticogenesis                                           |
| 7  | Actin binding LIM protein 1                         | ABLIM1  | 97       | 201          | 6               | actin cytoskeleton organization; axon guidance; transcription regulation                                                                                     |
| 8  | Cortactin                                           | CTTN    | 61       | 188          | 6               | actin cytoskeleton organization; dendritic spine morphogenesis; cell migration; cell adhesion junctions                                                      |
| 9  | Calcium/calmodulin-dependent protein kinase II beta | CAMK2B  | 61       | 178          | 4               | protein serine/threonine kinase activity; regulation of long-term neuronal plasticity; regulation of neuron projection development; apoptosis; Wnt signaling |
| 10 | Interleukin enhancer binding factor 2               | ILF2    | 43       | 170          | 4               | DNA binding; RNA binding; regulation of transcription                                                                                                        |
| 11 | Interleukin enhancer binding factor 3               | ILF3    | 96       | 126          | 4               | DNA binding; RNA binding; regulation of transcription; immune response                                                                                       |
| 12 | Casein kinase 2A                                    | CSNK2A1 | 45       | 125          | 4               | ATP binding, beta-catenin binding, axon guidance, protein serine/threonine kinase activity, cell cycle, signal transduction                                  |
| 13 | Metastasis associated 1                             | MTA1    | 79       | 104          | 3               | DNA binding; regulation of transcription; Wnt signaling                                                                                                      |
| 14 | Metastasis associated 1 family, member 2            | MTA2    | 75       | 104          | 3               | DNA binding; regulation of transcription; Wnt signaling                                                                                                      |
| 15 | RAN binding protein 10                              | RANBP10 | 70       | 104          | 3               | Ran GTPase binding; beta-tubulin binding; microtubule cytoskeleton organization                                                                              |
| 16 | Dedicator of cytokinesis 7                          | DOCK7   | 238      | 102          | 4               | Rac GTPase binding; microtubule cytoskeleton organization; axonogenesis; cell polarity; Schwann cell differentiation and myelination                         |

|    |                                                     |          |     |     |   |                                                                                                                                                       |
|----|-----------------------------------------------------|----------|-----|-----|---|-------------------------------------------------------------------------------------------------------------------------------------------------------|
| 17 | Nitric oxide synthase 1 (neuronal) adaptor protein  | NOS1AP   | 56  | 100 | 2 | Nitric-oxide synthase binding; link Abl family kinases and the actin cytoskeleton                                                                     |
| 18 | Nucleolin                                           | NCL      | 77  | 99  | 2 | DNA binding; RNA binding                                                                                                                              |
| 19 | Actin filament associated protein 1                 | AFAP1    | 81  | 93  | 2 | actin binding                                                                                                                                         |
| 20 | Cytoplasmic linker associated protein 1             | CLASP1   | 169 | 88  | 3 | actin and microtubule cytoskeleton organization; axon guidance                                                                                        |
| 21 | Regulating synaptic membrane exocytosis 1           | RIMS1    | 163 | 88  | 4 | Rab GTPase binding; exocytosis; neurotransmitter transport; regulation of long-term synaptic neuronal plasticity                                      |
| 22 | Contactin 1                                         | CTN1     | 113 | 80  | 2 | cell adhesion; axon guidance                                                                                                                          |
| 23 | Neuron navigator 1                                  | NAV1     | 202 | 80  | 2 | cell differentiation; microtubule cytoskeleton organization                                                                                           |
| 24 | Metastasis associated 1 family, member 3            | MTA3     | 66  | 78  | 2 | DNA binding; regulation of transcription; Wnt signaling                                                                                               |
| 25 | Lysosomal trafficking regulator                     | LYST     | 425 | 76  | 3 | endosome to lysosome transport                                                                                                                        |
| 26 | Molecule interacting with CasL 1                    | MICAL1   | 109 | 75  | 2 | actin cytoskeleton organization; microtubule cytoskeleton organization; regulation of protein phosphorylation; apoptosis                              |
| 27 | CDC42 binding protein kinase alpha (DMPK-like)      | CDC42BPA | 197 | 72  | 3 | protein serine/threonine kinase activity; actin cytoskeleton organization; cell migration; signal transduction; microtubule cytoskeleton organization |
| 28 | Dynactin 1                                          | DCTN1    | 140 | 70  | 2 | microtubule cytoskeleton organization; axonogenesis                                                                                                   |
| 29 | Nuclear mitotic apparatus protein 1                 | NUMA1    | 236 | 70  | 3 | microtubule binding; mitotic spindle orientation                                                                                                      |
| 30 | Valosin-containing protein                          | VCP      | 89  | 68  | 2 | ATPase activity; ER to Golgi vesicle-mediated transport; regulation of protein complex assembly; apoptosis                                            |
| 31 | CDC5 cell division cycle 5-like ( <i>S. pombe</i> ) | CDC5L    | 92  | 68  | 3 | DNA binding; RNA binding; regulation of transcription                                                                                                 |
| 32 | Leucine rich repeat (in FLII) interacting protein 2 | LRRFIP2  | 47  | 67  | 2 | Wnt receptor signaling                                                                                                                                |

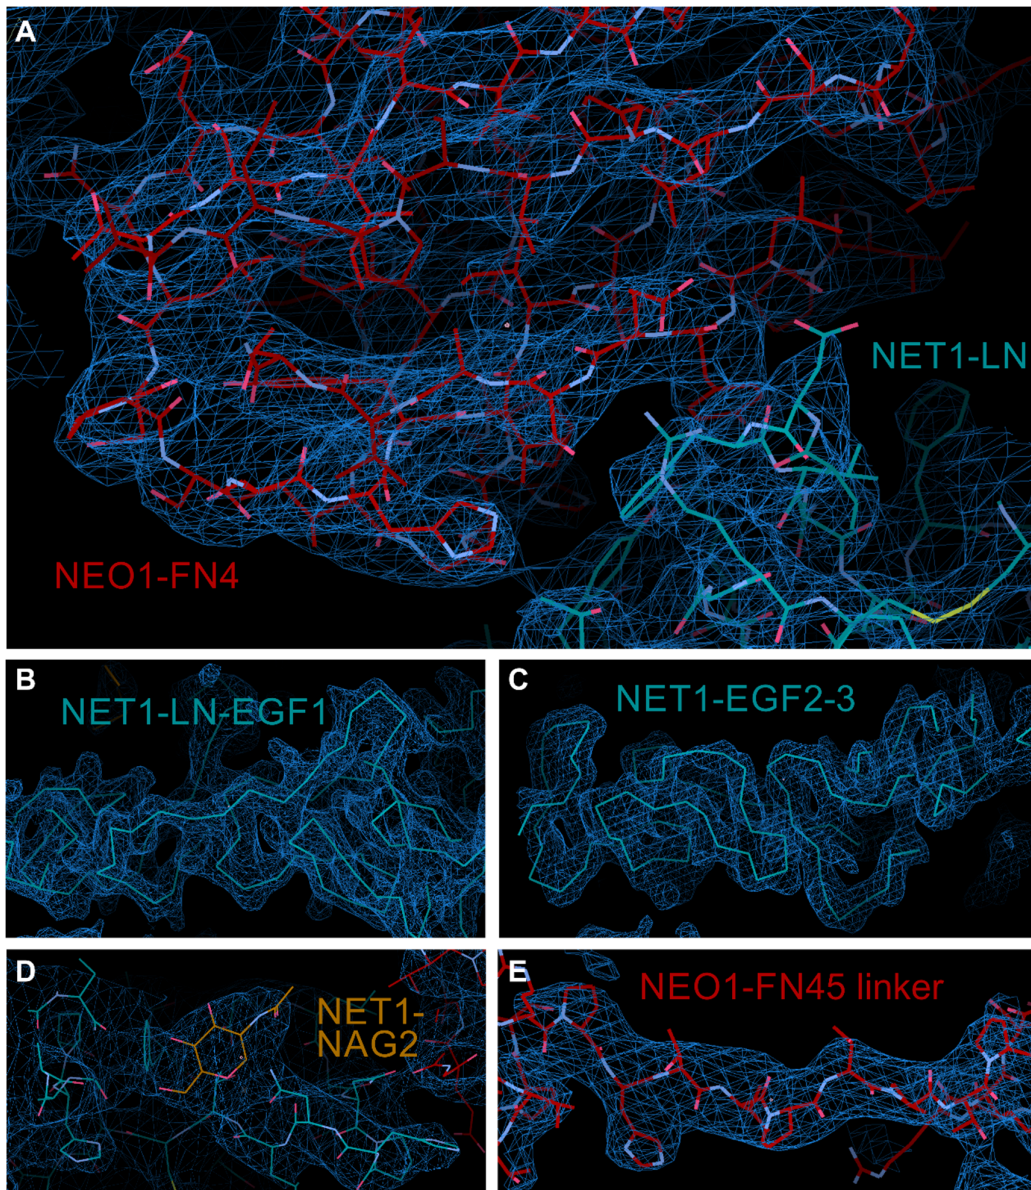

**Methods S1. SigmaA-weighted 2Fo-Fc maps of the NEO1-NET1-RGMB complex from the final round of refinement in AutoBuster. Related to Figure 1 and Star Methods. (A)** NEO1-FN4:NET1-LN interface. **(B)** The base of the NET1 LN head and EGF1. **(C)** NET1 EGF2-3. **(D)** N-acetyl-glucosamine 1 (see Fig. S9) on the NET1 surface. **(E)** The ordered linker region between NEO1 FN repeats 4 and 5. All models and maps were displayed using COOT, with maps contoured at  $1\sigma$ .

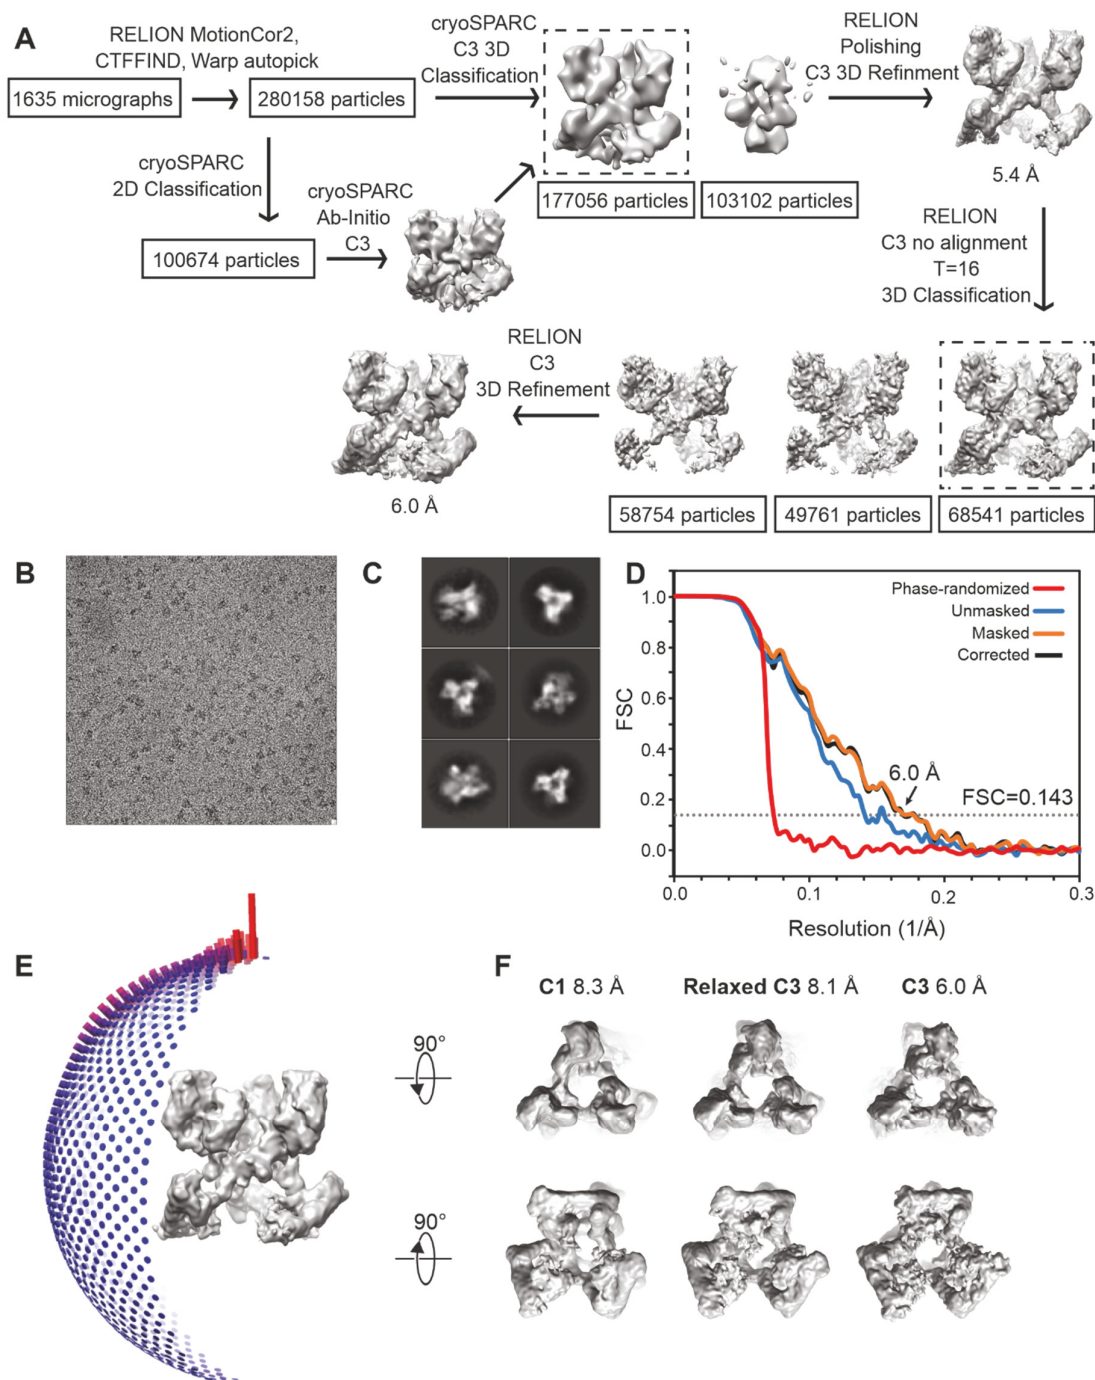

**Methods S2. Cryo-EM image processing procedure for the ternary NEO1<sub>FN456</sub>-NET1-RGM complex. Related to Figure 2 and Star Methods.** (A) Graphical overview of cryo-EM data collection and image processing using RELION 3.1 and cryoSPARC v2. In short, drift correction, beam-induced motion and dose-weighting were done with MotionCor2 in RELION 3.1, particle automated picking was performed in Warp. Representative aligned, dose-weighted



micrograph depicted in **(B)** and representative 2D class averages in **(C)**. Ab-initio 3D model was generated with cryoSPARC v2 from best selected 2D class average 100674 particles. cryoSPARC v2 3D classification was performed with all picked particles and best class with 177056 particles imported in RELION 3.1, performed 3D refinement and Bayesian particle polishing. 3D classification without alignment with regularisation parameter set to T=16 gave one class with more continuous map for RGMB, which was refined to 6.0 Å resolution, as estimated using the Fourier shell correlation (FSC) = 0.143 criterion (dashed line) **(D)**. Curves are shown for the phase randomized (red), unmasked (blue), masked (orange) and phase-randomization-corrected masked (black) maps. **(E)** Angular-distribution histogram of particles projections used in calculating the final 3D reconstruction of the complex. **(F)** Maps comparison refined with C3 symmetry (right panel), with C1 (left panel) and relaxed C3 symmetry (middle panel) in RELION 3.1.
